# Supplementary material for: Novel genomic targets of valosin-containing protein in protecting pathological cardiac hypertrophy
Source: PubMed Central journal article supplement (PMC7582185; doi:10.1038/s41598-020-75128-z), 2020-10-22
Supplement: 41598_2020_75128_MOESM1_ESM.pdf [file 41598_2020_75128_MOESM1_ESM.pdf]

## Supplemental Data (2 Figures; 3 Tables)

### Novel genomic targets of valosin-containing protein in protecting pathological cardiac hypertrophy

Ning Zhou<sup>a,b\*</sup>, Xin Chen<sup>c\*</sup>, Jing Xia<sup>a\*</sup>, Ben Ma<sup>a,e</sup>, Christiana Leimena<sup>a</sup>, Shaunrick Stolla, Gangjian Qin<sup>d</sup>, Charles Wang<sup>c#</sup>, Hongyu Qiu<sup>a,e #</sup>

- a. Division of Physiology, Department of Basic Sciences, School of Medicine, Loma Linda University, Loma Linda, CA, 92350 USA
- b. Division of Cardiology, Department of Internal Medicine, Tongji Hospital, Tongji Medical College, Huazhong University of Science and Technology, Wuhan, 430000, China
- c. Center for Genomics & Department of Basic Sciences, School of Medicine, Loma Linda University, Loma Linda, CA 92350, USA;
- d. Department of Biomedical Engineering, School of Medicine and School of Engineering, University of Alabama at Birmingham, Birmingham, AL 35294, USA
- e. Center of Molecular and Translational Medicine, Institution of Biomedical Science, Georgia State University, Atlanta, GA 30303, USA

#### \* Equal contributions

#### # Correspondences to:

Hongyu Qiu, MD, PhD  
Center of Molecular and Translational Medicine  
Institution of Biomedical Science  
Georgia State University  
Petit Research Center, Room 588  
100 Piedmont Ave  
Atlanta, GA 30303  
Tel: 404 413 3371  
Fax: 404-413-9566  
Email: hqiu@gsu.edu

Charles Wang, MD, PhD  
Center for Genomics  
Department of Basic Sciences  
School of Medicine  
Loma Linda University  
11021 Campus Street, AH 120/104  
Loma Linda, CA 92350  
Phone: 909-558-8759  
Fax: 909-558-0464  
Email:chwang@llu.edu

Short title: Gene regulation of VCP against cardiac pressure overload

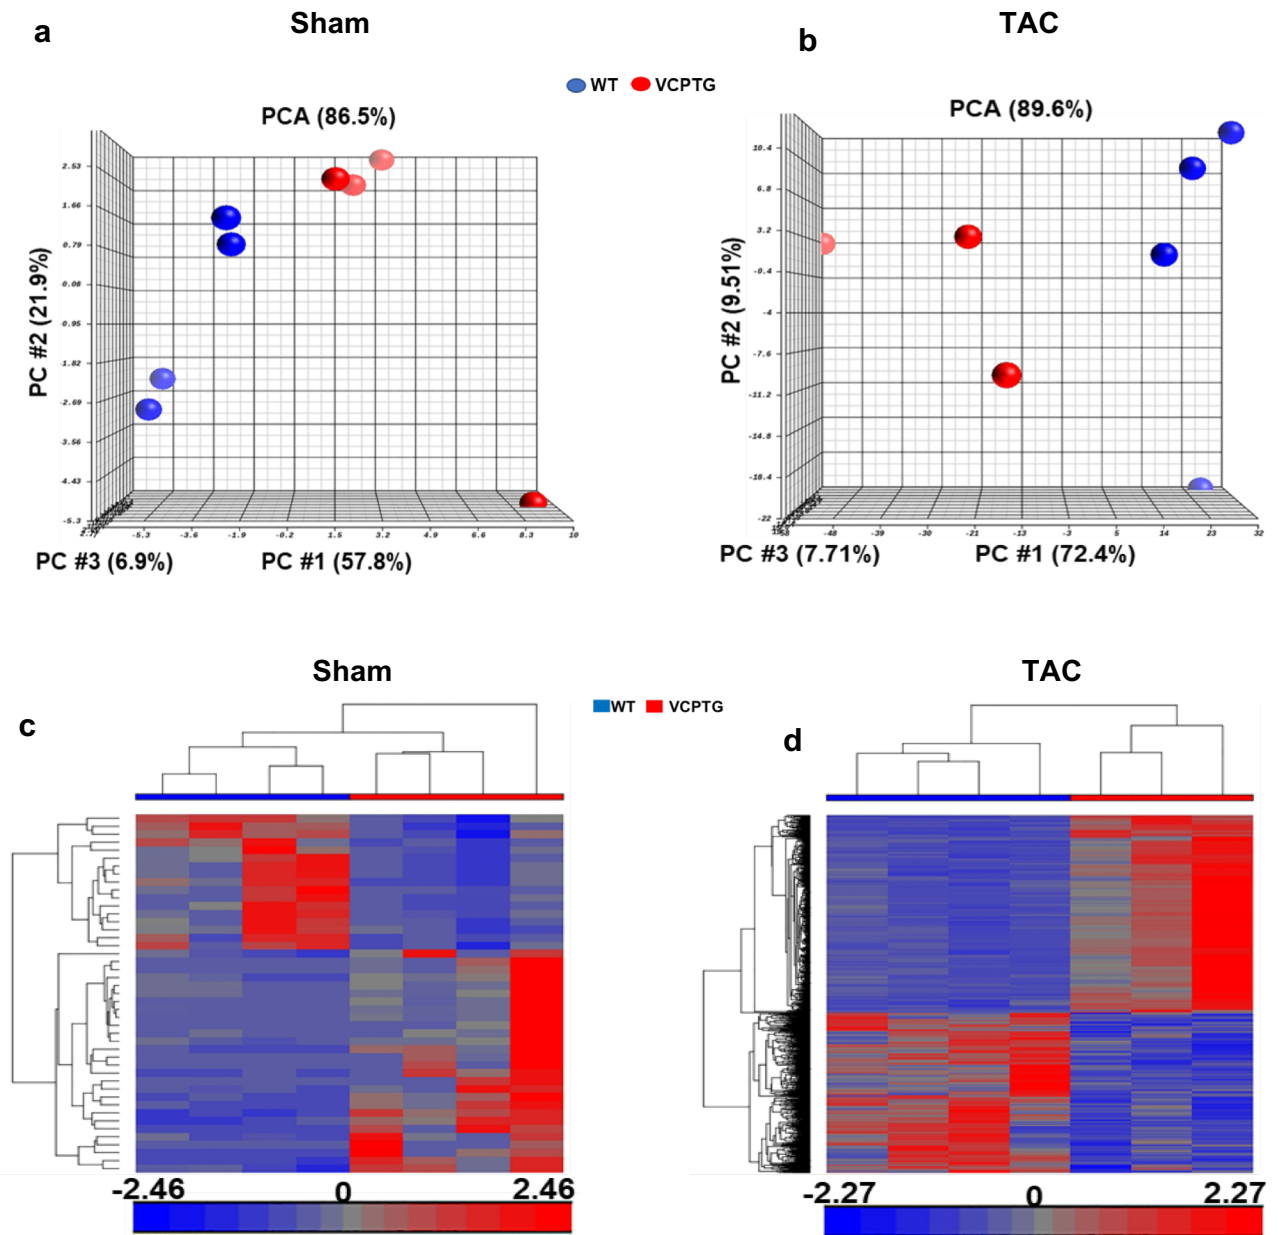

**Figure S1. The profiles of the transcriptomic alterations between VCP TG and WT mice at the sham and 2 weeks TAC conditions. a-b.** Principal component analysis (PCA) and **c-d.** Hierarchical clustering of differentially expressed genes (DEGs) between VCP TG and WT mice with FDR < 0.05 in sham (a and c) and 2W TAC (b and d). N=3-4/group.

Table S1. Top DEGs between VCP TG and WT by fold changes

| sham               |         |          |           |                  | 2 weeks TAC        |         |          |          |                 |
|--------------------|---------|----------|-----------|------------------|--------------------|---------|----------|----------|-----------------|
| Transcript ID      | log2 FC | P value  | FDR       | Genes            | Transcript ID      | log2 FC | P value  | FDR      | Genes           |
| ENSMUSG00000030046 | 10.07   | 5.07E-07 | 2.312E-03 | <i>Bmp10</i>     | ENSMUSG00000099620 | 5.88    | 2.23E-04 | 9.00E-03 | <i>Mrgprb13</i> |
| ENSMUSG00000083327 | 8.68    | 3.40E-08 | 4.620E-04 | <i>Vcp-rs</i>    | ENSMUSG00000102781 | 5.07    | 3.13E-03 | 4.40E-02 | <i>Pla2r1</i>   |
| ENSMUSG00000041616 | 5.11    | 3.90E-05 | 2.830E-02 | <i>Nppa</i>      | ENSMUSG00000009356 | 4.91    | 1.74E-04 | 7.00E-03 | <i>Lpo</i>      |
| ENSMUSG00000049436 | 4.32    | 3.31E-05 | 2.805E-02 | <i>Upk1b</i>     | ENSMUSG00000027376 | 4.81    | 8.93E-06 | 1.00E-03 | <i>Prom2</i>    |
| ENSMUSG00000069476 | 4.26    | 3.12E-05 | 2.805E-02 | <i>Zfp616</i>    | ENSMUSG00000020805 | 4.45    | 3.16E-04 | 1.10E-02 | <i>Slc13a5</i>  |
| ENSMUSG00000039419 | 3.90    | 4.50E-05 | 3.127E-02 | <i>Cntnap2</i>   | ENSMUSG00000042002 | 4.33    | 3.96E-04 | 1.20E-02 | <i>Foxn4</i>    |
| ENSMUSG00000027867 | 3.89    | 3.46E-05 | 2.805E-02 | <i>Spag17</i>    | ENSMUSG00000050201 | 4.07    | 2.81E-03 | 4.10E-02 | <i>Otop2</i>    |
| ENSMUSG00000039963 | 3.84    | 6.04E-07 | 2.312E-03 | <i>Ccdc40</i>    | ENSMUSG00000020159 | 3.64    | 4.51E-05 | 3.00E-03 | <i>Gabrp</i>    |
| ENSMUSG00000073940 | 3.67    | 9.86E-05 | 4.569E-02 | <i>Hbb-bt</i>    | ENSMUSG00000021441 | 3.61    | 1.22E-04 | 6.00E-03 | <i>Cts6</i>     |
| ENSMUSG00000025889 | 3.63    | 4.75E-08 | 4.620E-04 | <i>Snca</i>      | ENSMUSG00000017950 | 3.42    | 1.89E-03 | 3.20E-02 | <i>Hnf4a</i>    |
| ENSMUSG00000079014 | -3.30   | 1.68E-05 | 1.814E-02 | <i>Serpina3i</i> | ENSMUSG00000061295 | 3.40    | 1.65E-03 | 3.00E-02 | <i>Olf1261</i>  |
| ENSMUSG00000043410 | 3.21    | 9.63E-05 | 4.568E-02 | <i>Hfm1</i>      | ENSMUSG00000073952 | 3.40    | 1.18E-03 | 2.40E-02 | <i>Olf1597</i>  |
| ENSMUSG00000006403 | -3.05   | 5.35E-05 | 3.473E-02 | <i>Adamts4</i>   | ENSMUSG00000025576 | 3.38    | 1.65E-03 | 3.00E-02 | <i>Rbfox3</i>   |
| ENSMUSG00000030616 | 3.03    | 4.02E-06 | 7.120E-03 | <i>Sytl2</i>     | ENSMUSG00000000103 | 3.19    | 1.55E-03 | 2.80E-02 | <i>Zfy2</i>     |
| ENSMUSG00000075249 | 2.87    | 7.82E-06 | 1.015E-02 | <i>Fsip2</i>     | ENSMUSG00000061457 | 3.19    | 2.29E-04 | 9.00E-03 | <i>Olf1871</i>  |
| ENSMUSG00000025473 | -2.79   | 4.56E-06 | 7.389E-03 | <i>Adam8</i>     | ENSMUSG00000034552 | 3.19    | 2.41E-05 | 2.00E-03 | <i>Zswim2</i>   |
| ENSMUSG00000034533 | 2.60    | 1.07E-06 | 2.597E-03 | <i>Scn10a</i>    | ENSMUSG00000040728 | 3.06    | 1.09E-04 | 5.00E-03 | <i>Esrp1</i>    |
| ENSMUSG00000062991 | 2.34    | 5.62E-05 | 3.527E-02 | <i>Nrg1</i>      | ENSMUSG00000022416 | 2.98    | 1.05E-03 | 2.30E-02 | <i>Cacna1i</i>  |
| ENSMUSG00000025902 | -2.11   | 8.41E-06 | 1.023E-02 | <i>Sox17</i>     | ENSMUSG00000027457 | 2.98    | 7.27E-04 | 1.80E-02 | <i>Snph</i>     |
| ENSMUSG00000030748 | -2.06   | 1.06E-05 | 1.216E-02 | <i>Il4ra</i>     | ENSMUSG00000096284 | 2.95    | 1.27E-03 | 2.50E-02 | <i>Tcstv1</i>   |

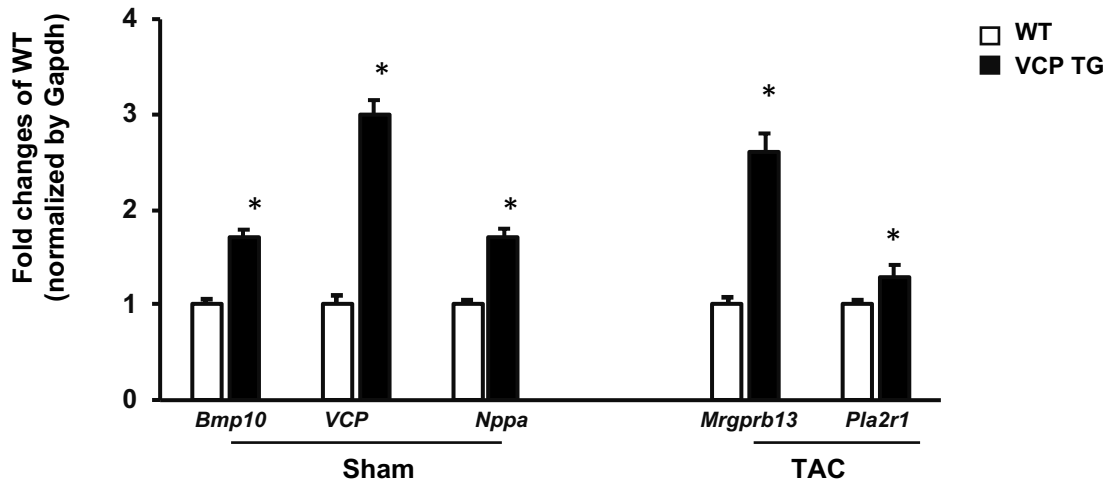

Figure S2. The validation of the alterations of the top DEGs between VCP TG vs WT by qPCR. \*, p < 0.05 vs WT. N=4-5/groups

**Table S2. DEGs detected between VCP TG vs WT at sham condition based on FDR<0.05 and their corresponding alterations under 2W TAC based on fold changes**

| <b>Gene symbol</b>   | <b>Sham: VCP TG vs WT<br/>log2FoldChange</b> | <b>2W TAC: VCP TG vs WT<br/>log2FoldChange</b> | <b>WT: 2W TAC vs sham<br/>log2FoldChange</b> |
|----------------------|----------------------------------------------|------------------------------------------------|----------------------------------------------|
| <i>Hlf</i>           | 1.285                                        | 0.515                                          | -0.461                                       |
| <i>Adamts4</i>       | -3.047                                       | 0.015                                          | 2.162                                        |
| <i>Rgcc</i>          | -1.864                                       | -0.433                                         | 1.739                                        |
| <i>Angpt1</i>        | 1.706                                        | 0.2                                            | -1.103                                       |
| <i>Tfrc</i>          | 1.083                                        | 0.26                                           | -0.537                                       |
| <i>Fas</i>           | -1.835                                       | -0.5                                           | 1.2                                          |
| <i>Adam8</i>         | -2.789                                       | 1.049                                          | 3.026                                        |
| <i>Snca</i>          | 3.634                                        | -0.516                                         | -1.086                                       |
| <i>Sox17</i>         | -2.108                                       | -0.042                                         | 2.336                                        |
| <i>Epha4</i>         | 1.515                                        | 0.537                                          | -0.482                                       |
| <i>Kcnj3</i>         | 1.684                                        | -0.108                                         | -1.398                                       |
| <b>Mamdc4</b>        | <b>-1.65</b>                                 | <b>1.066</b>                                   | <b>1.577</b>                                 |
| <i>Spag17</i>        | 3.887                                        | 0.373                                          | -4.449                                       |
| <i>Vcp</i>           | 1.051                                        | 0.78                                           | -0.278                                       |
| <i>Tinag1l</i>       | -1.621                                       | 0.099                                          | 1.537                                        |
| <i>Lrrc47</i>        | -1.036                                       | 0.1                                            | 1.305                                        |
| <i>Bmp10</i>         | 10.073                                       | 0.663                                          | NA                                           |
| <i>Syt12</i>         | 3.031                                        | 0.454                                          | -2.885                                       |
| <i>Il4ra</i>         | -2.064                                       | -0.443                                         | 1.724                                        |
| <i>Tacc2</i>         | -1.417                                       | 0.252                                          | 1.383                                        |
| <i>Plscr2</i>        | -1.334                                       | -0.591                                         | 1.213                                        |
| <i>Scn10a</i>        | 2.602                                        | 0.892                                          | NA                                           |
| <i>Aldh1b1</i>       | 1.976                                        | 0.35                                           | -1.104                                       |
| <i>Sh3tc1</i>        | -1.463                                       | 0.131                                          | 1.665                                        |
| <i>Prdm16</i>        | -0.941                                       | -0.699                                         | 0.954                                        |
| <b>Cntnap2</b>       | <b>3.904</b>                                 | <b>2.009</b>                                   | <b>-2.954</b>                                |
| <i>Ccdc40</i>        | 3.843                                        | -1.444                                         | -3.652                                       |
| <i>Spns2</i>         | -1.425                                       | 0.139                                          | 1.474                                        |
| <b>Fam117b</b>       | <b>-1.548</b>                                | <b>-0.866</b>                                  | <b>0.729</b>                                 |
| <i>Nppa</i>          | 5.106                                        | -1.122                                         | NA                                           |
| <b>Hfm1</b>          | <b>3.215</b>                                 | <b>1.731</b>                                   | <b>-2.543</b>                                |
| <b>BC049715</b>      | <b>3.858</b>                                 | <b>1.93</b>                                    | <b>-2.716</b>                                |
| <i>Upk1b</i>         | 4.315                                        | -0.573                                         | -6.224                                       |
| <i>2810025M15Rik</i> | -1.382                                       | 0.202                                          | 0.619                                        |
| <i>ErbB4</i>         | 1.614                                        | -0.074                                         | -1.216                                       |
| <i>Nrg1</i>          | 2.342                                        | -2.083                                         | NA                                           |
| <b>Zfp616</b>        | <b>4.265</b>                                 | <b>1.831</b>                                   | <b>-3.345</b>                                |
| <i>Hbb-bt</i>        | 3.666                                        | -0.084                                         | -1.355                                       |
| <i>Dcdc5</i>         | 1.746                                        | 0.04                                           | -2.559                                       |
| <b>Fsip2</b>         | <b>2.874</b>                                 | <b>1.969</b>                                   | <b>-2.937</b>                                |
| <i>Serpina3i</i>     | -3.295                                       | -0.674                                         | 1.847                                        |
| <i>Gm7901</i>        | 6.887                                        | 2.252                                          | -4.217                                       |
| <i>Vcp-rs</i>        | 8.68                                         | 2.728                                          | NA                                           |
| <i>Gm3099</i>        | 6.176                                        | 5.232                                          | NA                                           |
| <i>Gm16513</i>       | 4.469                                        | 1.65                                           | -3.986                                       |

**Table S3. The DETX between VCP TG and WT in different comparisons**

| Sham: VCP TG vs WT |                 |      |            | 2W TAC: VCP TG vs WT |                |      |            | WT: 2W TAC vs Sham |                 |      |            |
|--------------------|-----------------|------|------------|----------------------|----------------|------|------------|--------------------|-----------------|------|------------|
| ETX_cluster        | DETX_gen        | DETX | DETX_p.adj | ETX_cluster          | DETX_ge        | DETX | DETX_p.adj | ETX_cluster        | DETX_ge         | DETX | DETX_p.adj |
| chr4:clu_504_NA    | <i>Asph</i>     | 10   | 0.00093    | chr2:clu_3453_NA     | <i>Ttn</i>     | 29   | 8.80E-10   | chr4:clu_483_NA    | <i>Asph</i>     | 10   | 2.0955E-06 |
| chr7:clu_1121_NA   | <i>Tacc2</i>    | 13   | 0.01753    | chr11:clu_4241_NA    | <i>Obscn</i>   | 23   | 0.00565    | chr19:clu_2990_NA  | <i>Sorbs1</i>   | 9    | 2.7497E-05 |
| chr19:clu_2969_NA  | <i>Sorbs1</i>   | 11   | 0.0169     | chr2:clu_3460_NA     | <i>Ttn</i>     | 7    | 8.55E-06   | chr7:clu_883_NA    | <i>Fxyd1</i>    | 5    | 1.3969E-05 |
| chr17:clu_444_NA   | <i>Ptprm</i>    | 5    | 0.01056    | chr16:clu_2899_NA    | <i>Eif4g1</i>  | 7    | 0.00344    | chr8:clu_2265_NA   | <i>Sorbs2</i>   | 8    | 0.00019223 |
| chr4:clu_678_NA    | <i>Epb4.1</i>   | 4    | 0.02129    | chr7:clu_753_NA      | <i>Fxyd1</i>   | 8    | 0.00565    | chr16:clu_3533_NA  | <i>Srl</i>      | 4    | 2.482E-05  |
| chr15:clu_1439_NA  | <i>Pacsin2</i>  | 4    | 0.02588    | chr19:clu_2429_NA    | <i>Sorbs1</i>  | 9    | 0.00913    | chr3:clu_5013_NA   | <i>Myoz2</i>    | 7    | 0.00050803 |
| chr10:clu_3309_NA  | <i>Sar1a</i>    | 2    | 0.0169     | chr6:clu_3840_NA     | <i>Wnk1</i>    | 7    | 0.00605    | chr5:clu_2071_NA   | <i>Myl2</i>     | 5    | 0.00037213 |
| chr7:clu_1019_NA   | <i>Serpinh1</i> | 2    | 0.0169     | chr1:clu_2117_NA     | <i>Tns1</i>    | 5    | 0.00312    | chr10:clu_3454_NA  | <i>Mrpl42</i>   | 2    | 2.482E-05  |
| chr17:clu_440_NA   | <i>Ndufv2</i>   | 2    | 0.0169     | chr16:clu_2939_NA    | <i>Golgb1</i>  | 6    | 0.00673    | chr5:clu_1878_NA   | <i>Hadhb</i>    | 6    | 0.00137584 |
| chr7:clu_1165_NA   | <i>Nap114</i>   | 2    | 0.0169     | chr19:clu_2423_NA    | <i>Sorbs1</i>  | 6    | 0.02871    | chr5:clu_1990_NA   | <i>Sec31a</i>   | 6    | 0.00534863 |
| chr8:clu_2450_NA   | <i>Sipa112</i>  | 2    | 0.02356    | chr9:clu_3257_NA     | <i>Clasp2</i>  | 2    | 0.00312    | chr17:clu_385_NA   | <i>Apobec2</i>  | 3    | 0.00137584 |
| chr16:clu_3560_NA  | <i>Comt</i>     | 2    | 0.02588    | chr11:clu_4296_NA    | <i>Eno3</i>    | 5    | 0.0312     | chr1:clu_5105_NA   | <i>Ogdh</i>     | 2    | 0.00050803 |
| chr18:clu_1748_NA  | <i>Arap3</i>    | 2    | 0.02588    | chr1:clu_2180_NA     | <i>Ppip5k2</i> | 5    | 0.03347    | chr19:clu_2932_NA  | <i>Prune2</i>   | 3    | 0.00156037 |
| chr2:clu_4214_NA   | <i>Ttn</i>      | 2    | 0.03074    | chr8:clu_1774_NA     | <i>Insr</i>    | 2    | 0.00497    | chrX:clu_1175_NA   | <i>Kdm6a</i>    | 4    | 0.00398873 |
| chr16:clu_3590_NA  | <i>Dlg1</i>     | 2    | 0.04115    | chr10:clu_2689_NA    | <i>Pln</i>     | 5    | 0.04452    | chr1:clu_2687_NA   | <i>Ppip5k2</i>  | 5    | 0.0129382  |
| chr9:clu_3732_NA   | <i>Dnm2</i>     | 2    | 0.04634    | chr9:clu_3277_NA     | <i>Trak1</i>   | 2    | 0.00789    | chr10:clu_3439_NA  | <i>Chpt1</i>    | 5    | 0.01333318 |
| chr1:clu_2653_NA   | <i>Hdac4</i>    | 1    | 0.04115    | chr10:clu_2784_NA    | <i>Chpt1</i>   | 4    | 0.03976    | chr8:clu_2453_NA   | <i>Zc3h18</i>   | 2    | 0.0011584  |
| chr14:clu_176_NA   | <i>Kctd9</i>    | 1    | 0.04479    | chr7:clu_808_NA      | <i>Pex11a</i>  | 4    | 0.04073    | chr1:clu_2611_NA   | <i>Tns1</i>     | 6    | 0.0237929  |
|                    |                 |      |            | chr14:clu_118_NA     | <i>Hnrnpc</i>  | 3    | 0.02598    | chr10:clu_3503_NA  | <i>Naca</i>     | 2    | 0.00156037 |
|                    |                 |      |            | chr17:clu_266_NA     | <i>Ndufv3</i>  | 2    | 0.01153    | chr16:clu_3630_NA  | <i>Golgb1</i>   | 6    | 0.03618515 |
|                    |                 |      |            | chr14:clu_132_NA     | <i>Myh6</i>    | 3    | 0.0312     | chr14:clu_124_NA   | <i>Hnrnpc</i>   | 3    | 0.00535741 |
|                    |                 |      |            | chr10:clu_2781_NA    | <i>Igf1</i>    | 2    | 0.01354    | chr7:clu_802_NA    | <i>Rdh13</i>    | 2    | 0.0026096  |
|                    |                 |      |            | chr18:clu_1458_NA    | <i>Csnk1a</i>  | 2    | 0.0229     | chr6:clu_4548_NA   | <i>Ndufa5</i>   | 2    | 0.00269151 |
|                    |                 |      |            | chr4:clu_612_NA      | <i>Hp1bp3</i>  | 3    | 0.04073    | chr3:clu_5057_NA   | <i>Nexn</i>     | 4    | 0.01661022 |
|                    |                 |      |            | chr14:clu_52_NA      | <i>Ppif</i>    | 2    | 0.0256     | chrX:clu_1212_NA   | <i>Idh3g</i>    | 4    | 0.01661022 |
|                    |                 |      |            | chr1:clu_2166_NA     | <i>Lrrfp1</i>  | 2    | 0.03951    | chr2:clu_4202_NA   | <i>March7</i>   | 2    | 0.003058   |
|                    |                 |      |            | chr5:clu_1565_NA     | <i>Ppargc1</i> | 2    | 0.03976    | chr1:clu_2652_NA   | <i>Sp100</i>    | 5    | 0.03618515 |
|                    |                 |      |            | chr17:clu_235_NA     | <i>Hagh</i>    | 2    | 0.04073    | chr17:clu_328_NA   | <i>Brd2</i>     | 3    | 0.01228053 |
|                    |                 |      |            | chr7:clu_937_NA      | <i>Tollip</i>  | 2    | 0.04361    | chr16:clu_3601_NA  | <i>Opa1</i>     | 2    | 0.00535741 |
|                    |                 |      |            | chr8:clu_1956_NA     | <i>Chtf8</i>   | 2    | 0.04452    | chr17:clu_360_NA   | <i>Rcan2</i>    | 2    | 0.00535741 |
|                    |                 |      |            | chr5:clu_1585_NA     | <i>Ociad1</i>  | 2    | 0.04452    | chr17:clu_351_NA   | <i>Rpp21</i>    | 2    | 0.00535741 |
|                    |                 |      |            | chr6:clu_3794_NA     | <i>Iqsec1</i>  | 1    | 0.02477    | chr11:clu_5302_NA  | <i>Myo18a</i>   | 2    | 0.00811435 |
|                    |                 |      |            | chr4:clu_445_NA      | <i>Npr2</i>    | 1    | 0.0256     | chr1:clu_2803_NA   | <i>Dcaf6</i>    | 2    | 0.00986572 |
|                    |                 |      |            | chr3:clu_3984_NA     | <i>Mrpl24</i>  | 1    | 0.02598    | chr7:clu_929_NA    | <i>Ube3a</i>    | 2    | 0.01117853 |
|                    |                 |      |            | chr13:clu_1310_NA    | <i>Ndufs6</i>  | 1    | 0.02851    | chr12:clu_3050_NA  | <i>Ncoa1</i>    | 4    | 0.04211347 |
|                    |                 |      |            | chr5:clu_1629_NA     | <i>Nudt9</i>   | 1    | 0.03976    | chr9:clu_3965_NA   | <i>Rbm5</i>     | 2    | 0.01228053 |
|                    |                 |      |            | chr7:clu_916_NA      | <i>Fam53b</i>  | 1    | 0.04073    | chr18:clu_1752_NA  | <i>Arap3</i>    | 2    | 0.01661022 |
|                    |                 |      |            | chr5:clu_1668_NA     | <i>Tesc</i>    | 1    | 0.04073    | chrX:clu_1233_NA   | <i>Apoa</i>     | 2    | 0.01661022 |
|                    |                 |      |            | chr7:clu_862_NA      | <i>lpo7</i>    | 1    | 0.04073    | chr2:clu_4203_NA   | <i>Itgb6</i>    | 2    | 0.01661022 |
|                    |                 |      |            |                      |                |      |            | chr14:clu_52_NA    | <i>Ppif</i>     | 2    | 0.01661022 |
|                    |                 |      |            |                      |                |      |            | chr10:clu_3331_NA  | <i>Sar1a</i>    | 2    | 0.0176823  |
|                    |                 |      |            |                      |                |      |            | chr16:clu_3590_NA  | <i>Tra2b</i>    | 2    | 0.02135337 |
|                    |                 |      |            |                      |                |      |            | chr8:clu_2335_NA   | <i>Arhgap10</i> | 2    | 0.02136414 |
|                    |                 |      |            |                      |                |      |            | chr7:clu_997_NA    | <i>Serpinh1</i> | 3    | 0.04274286 |
|                    |                 |      |            |                      |                |      |            | chr13:clu_1513_NA  | <i>Mtr</i>      | 2    | 0.0237929  |
|                    |                 |      |            |                      |                |      |            | chr16:clu_3657_NA  | <i>Cblb</i>     | 3    | 0.04785809 |
|                    |                 |      |            |                      |                |      |            | chr2:clu_4260_NA   | <i>Ccdc141</i>  | 2    | 0.02739385 |
|                    |                 |      |            |                      |                |      |            | chr5:clu_2007_NA   | <i>Gbp6</i>     | 2    | 0.03065032 |
|                    |                 |      |            |                      |                |      |            | chr2:clu_4165_NA   | <i>Dab2ip</i>   | 2    | 0.03065032 |
|                    |                 |      |            |                      |                |      |            | chr1:clu_2601_NA   | <i>Acadl</i>    | 2    | 0.03068008 |
|                    |                 |      |            |                      |                |      |            | chr2:clu_4250_NA   | <i>Ttn</i>      | 2    | 0.03068008 |
|                    |                 |      |            |                      |                |      |            | chr2:clu_4450_NA   | <i>Rbm39</i>    | 2    | 0.03618515 |
|                    |                 |      |            |                      |                |      |            | chr4:clu_575_NA    | <i>Nfia</i>     | 2    | 0.03618515 |
|                    |                 |      |            |                      |                |      |            | chrX:clu_1301_NA   | <i>Ms13</i>     | 2    | 0.03826999 |
|                    |                 |      |            |                      |                |      |            | chr18:clu_1807_NA  | <i>Tcf4</i>     | 2    | 0.03826999 |
|                    |                 |      |            |                      |                |      |            | chr7:clu_1145_NA   | <i>Nap114</i>   | 2    | 0.03871731 |
|                    |                 |      |            |                      |                |      |            | chr5:clu_1929_NA   | <i>Pcdh7</i>    | 1    | 0.01654877 |
|                    |                 |      |            |                      |                |      |            | chr18:clu_1778_NA  | <i>Synpo</i>    | 2    | 0.0400688  |
|                    |                 |      |            |                      |                |      |            | chr8:clu_2366_NA   | <i>Dnase2a</i>  | 1    | 0.01661022 |
|                    |                 |      |            |                      |                |      |            | chr15:clu_1354_NA  | <i>Tmem65</i>   | 2    | 0.04211347 |
|                    |                 |      |            |                      |                |      |            | chr7:clu_1083_NA   | <i>Tgfb1i1</i>  | 2    | 0.04211347 |
|                    |                 |      |            |                      |                |      |            | chr6:clu_4690_NA   | <i>Setd5</i>    | 2    | 0.04274286 |
|                    |                 |      |            |                      |                |      |            | chr7:clu_1052_NA   | <i>Ndufab1</i>  | 2    | 0.04274286 |
|                    |                 |      |            |                      |                |      |            | chr17:clu_318_NA   | <i>Hnrnmp</i>   | 2    | 0.04274286 |
|                    |                 |      |            |                      |                |      |            | chr12:clu_3149_NA  | <i>Srsf5</i>    | 2    | 0.04274286 |
|                    |                 |      |            |                      |                |      |            | chr18:clu_1781_NA  | <i>Camk2a</i>   | 2    | 0.04274286 |
|                    |                 |      |            |                      |                |      |            | chr1:clu_2686_NA   | <i>Ppip5k2</i>  | 1    | 0.01741987 |
|                    |                 |      |            |                      |                |      |            | chr19:clu_2970_NA  | <i>Btaf1</i>    | 1    | 0.0176823  |
|                    |                 |      |            |                      |                |      |            | chr3:clu_4935_NA   | <i>Ubap2l</i>   | 2    | 0.04971823 |
